# Supplementary material for: Donor–acceptor type polymers containing the 2,3-bis(2-pyridyl)-5,8-dibromoquinoxaline acceptor and different thiophene donors: electrochemical, spectroelectrochemistry and electrochromic properties
Source: Royal Society of Chemistry journal article supplement (doi:10.1039/c5nj02651b), 2015-12-23
Supplement: c5nj02651b1.pdf [file c5nj02651b1.pdf]

**New Journal of Chemistry**

**Electronic Supplementary Materials**

**Donor–acceptor type polymers containing  
2,3-bis(2-pyridyl)-5,8-dibromoquinoxaline acceptor and  
different thiophenes donors: Electrochemical,  
spectroelectrochemistry and electrochromic properties**

Shuang Chen<sup>1,2</sup>, Di Zhang<sup>1,2</sup>, Min Wang<sup>2</sup>, Lingqian Kong<sup>3</sup>, Jinsheng Zhao<sup>2\*</sup>

<sup>1</sup>Department of Chemical Engineering, China University of Petroleum (East China),  
QingDao, 266580, P. R. China

<sup>2</sup>Shandong Key Laboratory of Chemical Energy Storage and Novel Cell Technology,  
Liaocheng University, Liaocheng, 252059, P. R. China

Corresponding author, Tel: +86-635-8539607; Fax: +86-635-8539607.

E-mail address: [j.s.zhao@163.com](mailto:j.s.zhao@163.com) (j.s.zhao);

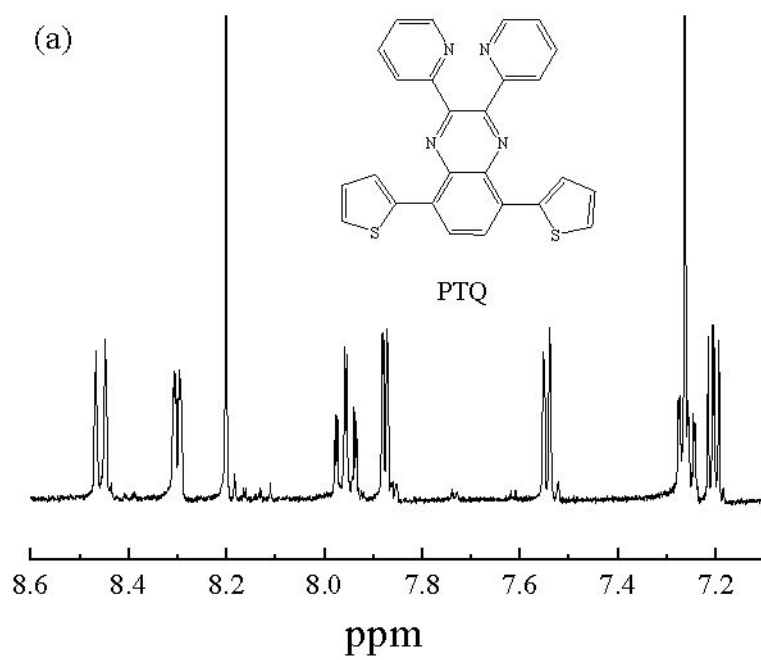

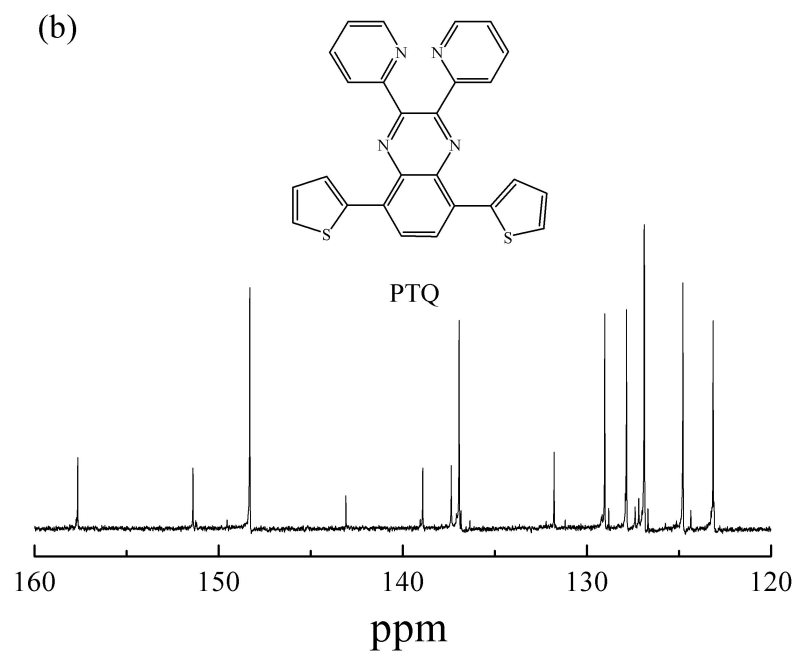

**Fig. S1.** (a)  $^1\text{H}$  NMR spectrum of 2,3-di(2-pyridyl)-5,8-bis(2-thienyl) quinoxaline (PTQ) in  $\text{CDCl}_3$ . (b)  $^{13}\text{C}$  NMR spectrum of PTQ in  $\text{CDCl}_3$ .

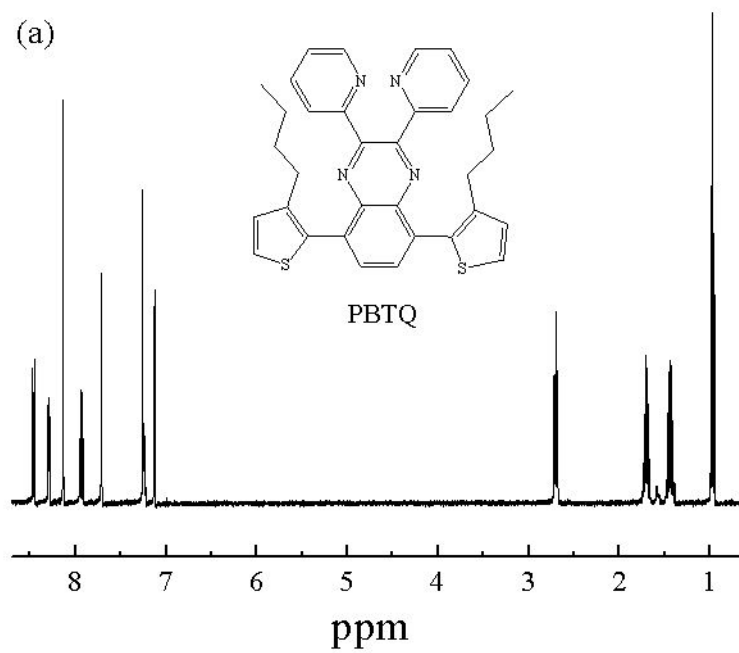

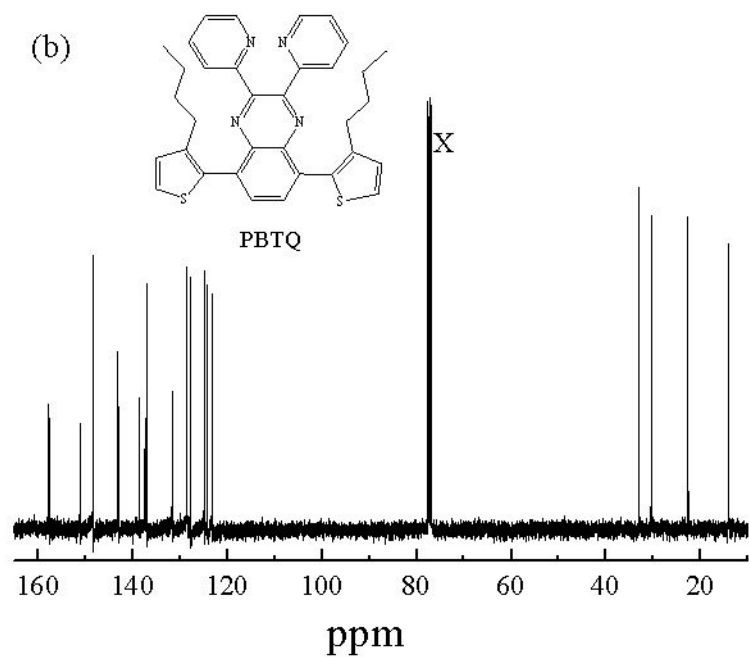

**Fig. S2.** (a)  $^1\text{H}$  NMR spectrum of 2,3-di(2-pyridyl)-5,8-bis(3-butylthiophen-2-yl) quinoxaline (PBTQ) in  $\text{CDCl}_3$ . (b)  $^{13}\text{C}$  NMR spectrum of PBTQ in  $\text{CDCl}_3$ . Solvent peak at  $\delta = 77.26$  ppm is marked by 'X'.

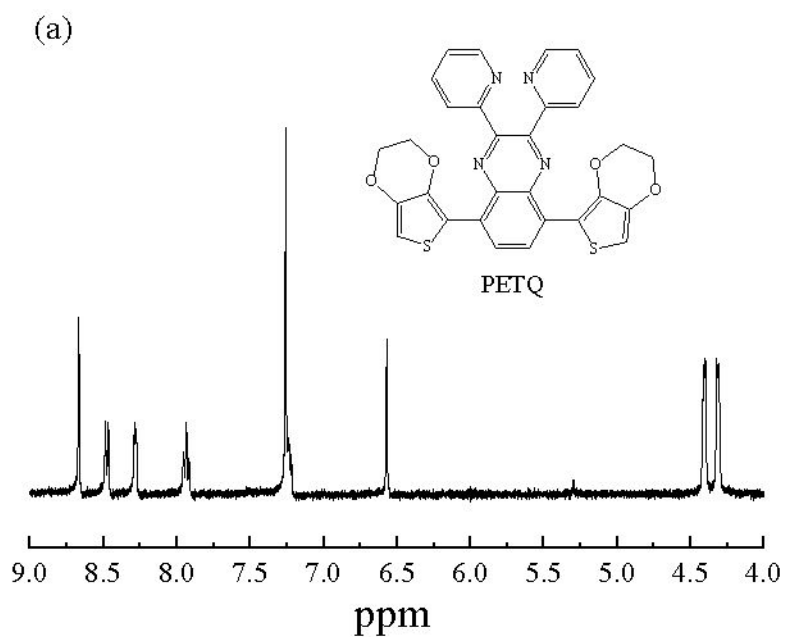

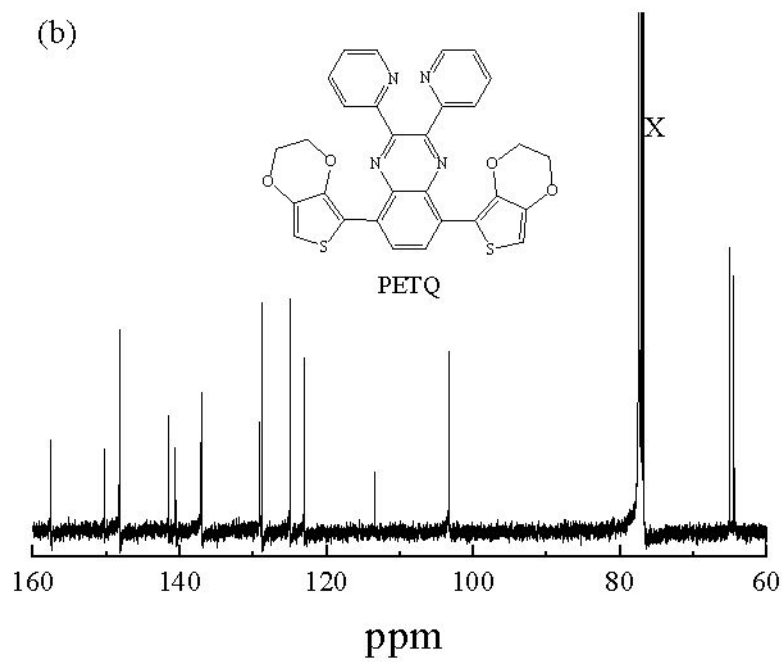

**Fig. S3.** (a)  $^1\text{H}$  NMR spectrum of 2,3-di(2-pyridyl)-5,8-bis(2-(3,4-ethylenedioxythienyl)) quinoxaline (PETQ) in  $\text{CDCl}_3$ . (b)  $^{13}\text{C}$  NMR spectrum of PETQ in  $\text{CDCl}_3$ . Solvent peak at  $\delta = 77.174$  ppm is marked by 'X'.

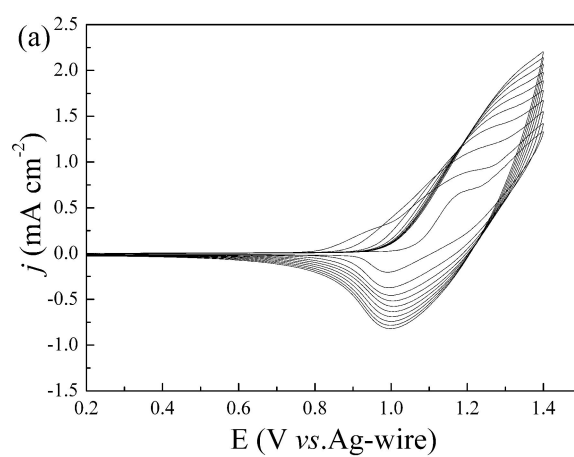

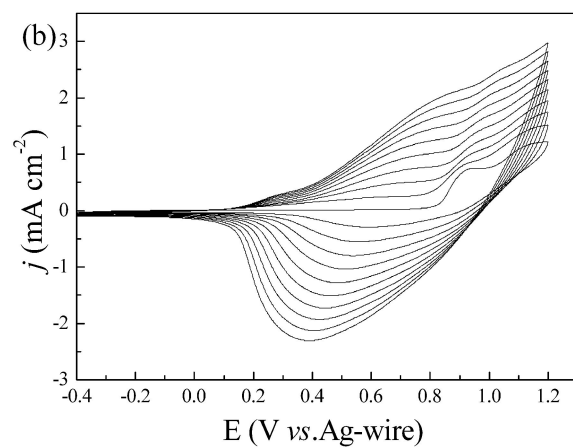

Fig. S4. Cyclic voltammogram curves of PBTQ (a) and PETQ (b) in 0.1 M TBAPF<sub>6</sub>/DCM solution at a scan rate of 100 mV s<sup>-1</sup> respectively.  $j$  denotes the current density.  $E$  denotes the potential.

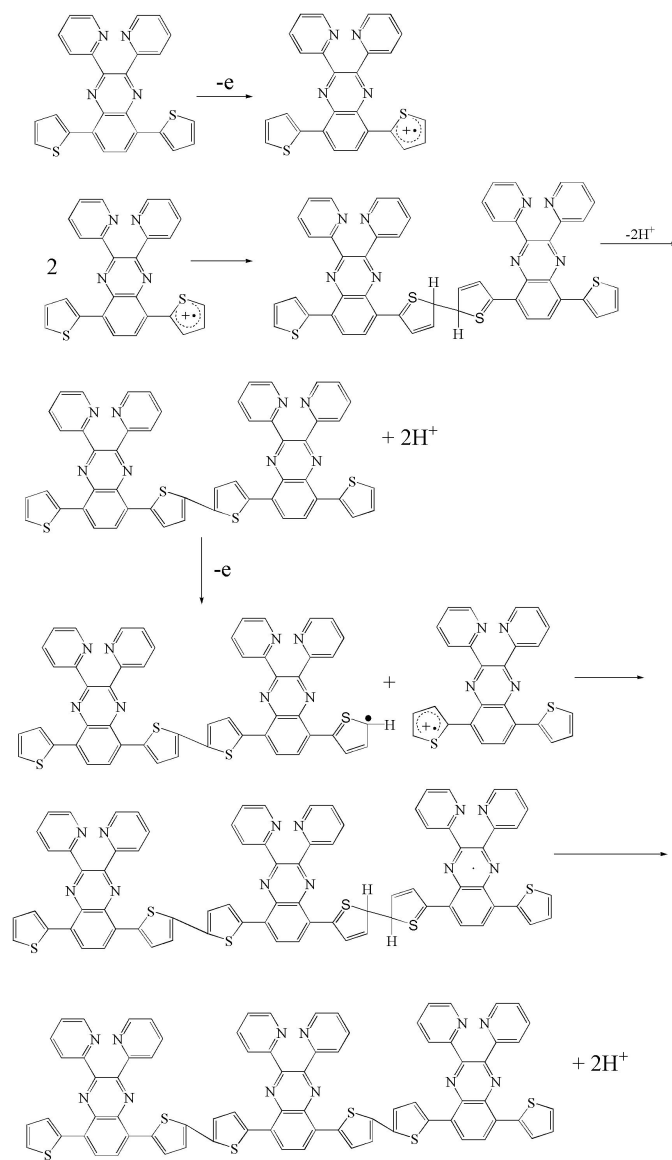

Fig.S5. The electrochemical polymerization mechanism of the synthesis of the polymer

PPTQ

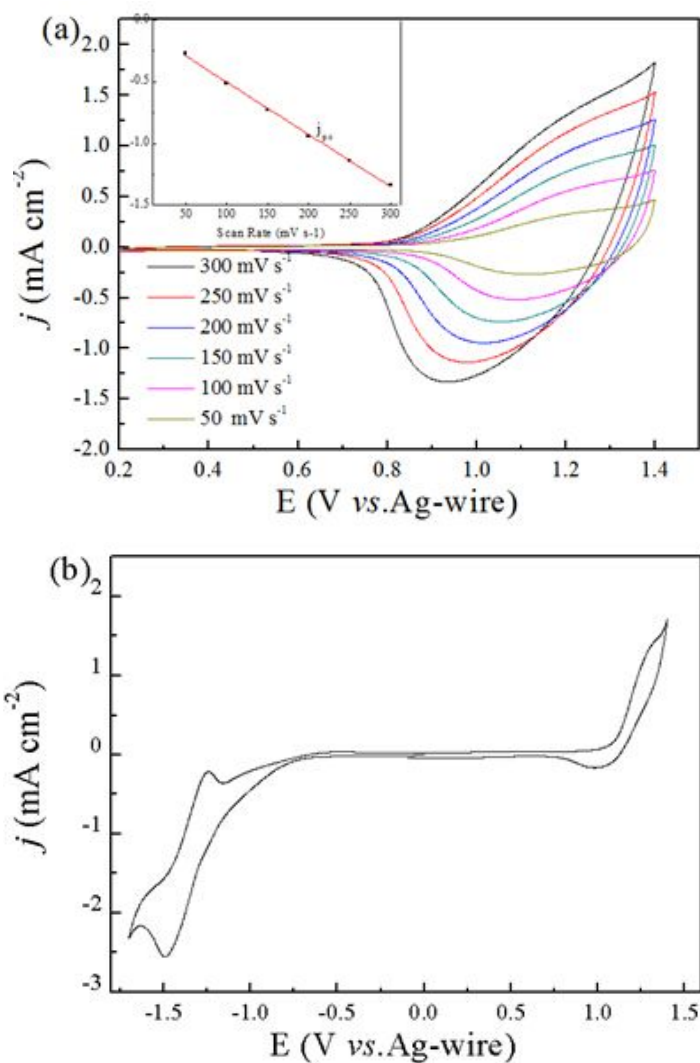

**Fig. S6.** (a) CV curves of PPTQ at different scan rates between 50 and 300 mV s<sup>-1</sup> in the monomer-free 0.1 M TBAPF<sub>6</sub>/DCM solution. Inset shows scan rate dependence of the anodic and cathodic peak current densities graph.  $j_{p,c}$  denotes cathodic peak current densities. (b) The cyclic voltammogram of the PTQ monomer at scan rate 100 mV s<sup>-1</sup>.



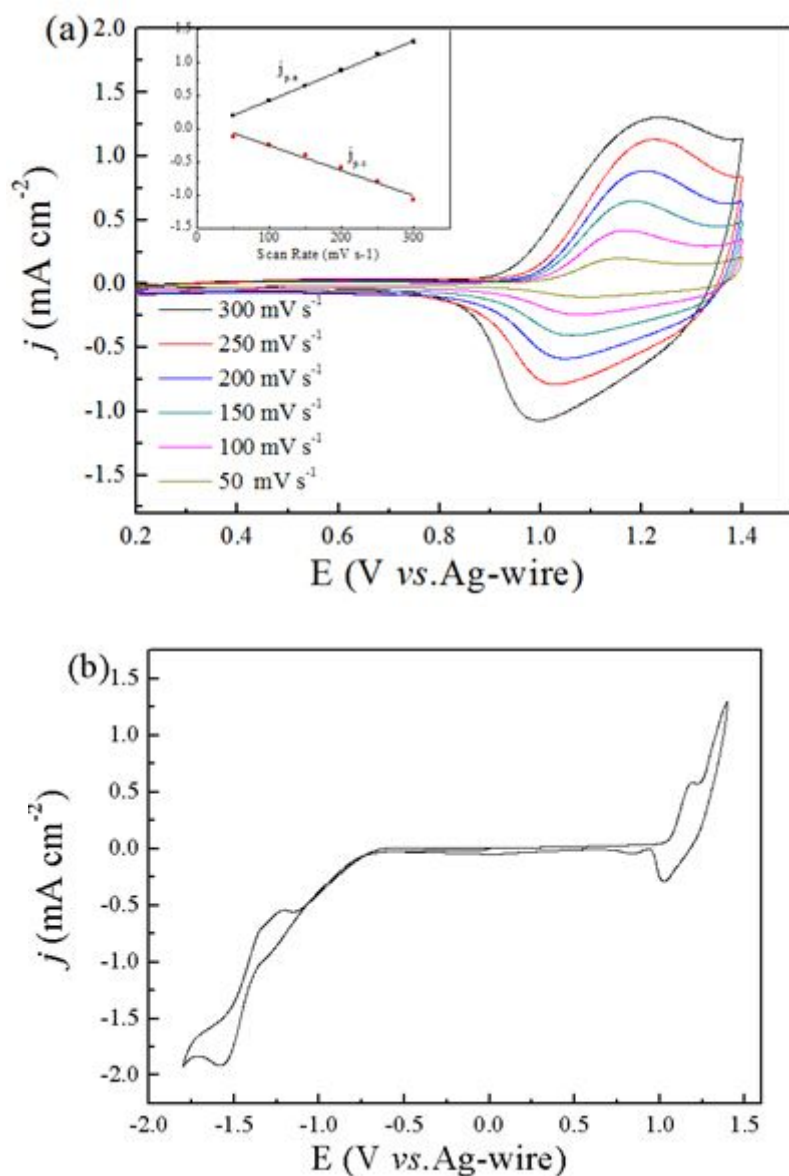

**Fig. S7.** (a) CV curves of PPBTQ at different scan rates between 50 and 300 mV s<sup>-1</sup> in the monomer-free 0.1 M TBAPF<sub>6</sub>/DCM solution. Inset shows scan rate dependence of the anodic and cathodic peak current densities graph.  $j_{p,a}$  and  $j_{p,c}$  denote the anodic and cathodic peak current densities, respectively. (b) The cyclic voltammogram of the PBTQ monomer at scan rate 100 mV s<sup>-1</sup>.

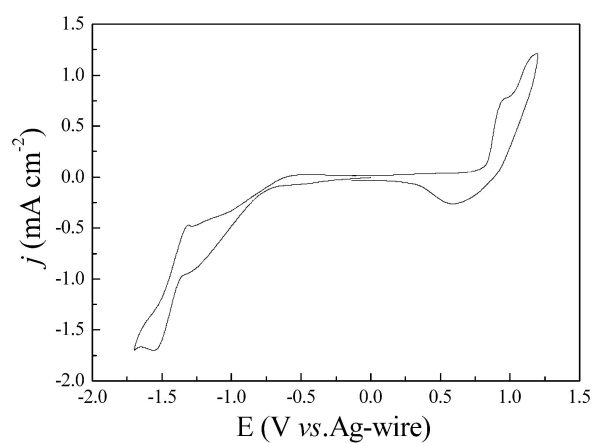

**Fig. S8.** The cyclic voltammogram of the PETQ monomer at scan rate  $100 \text{ mV s}^{-1}$ .

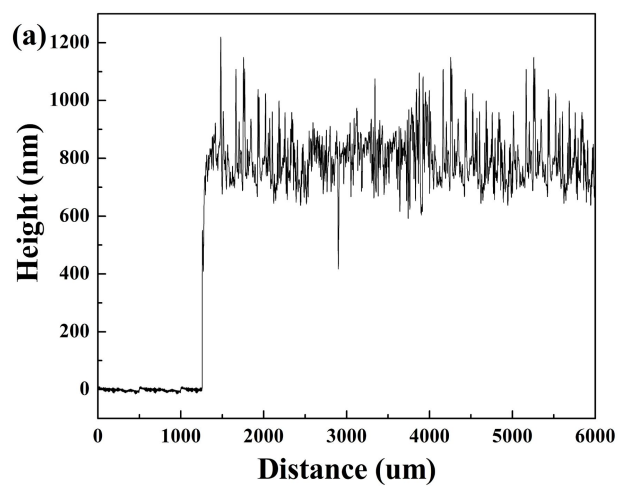

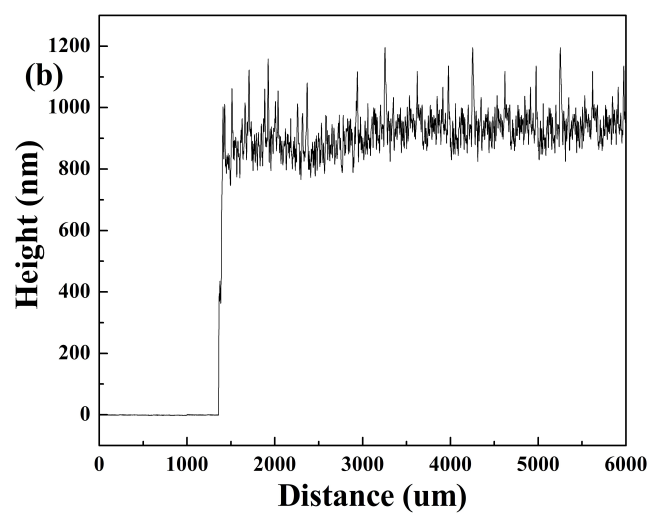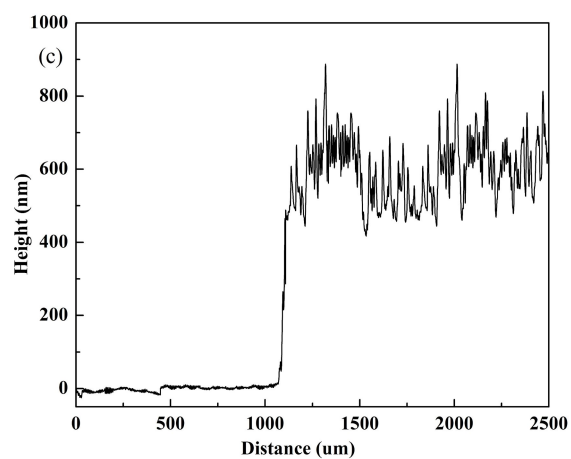

Fig.S9. The step profiler images of PPTQ (a), PPBTQ(b) and PPETQ (c) films deposited potentiostatically on ITO electrode with the same polymerization charge of  $2.0 \times 10^{-2}$  C at a surface area of  $0.9 \times 1.8$  cm<sup>2</sup>.

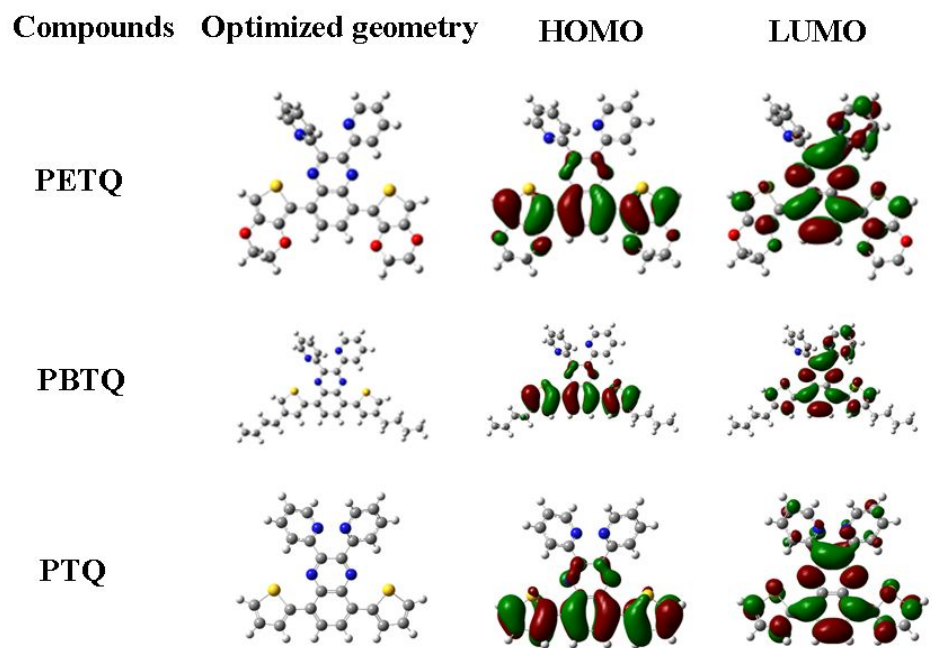

Fig. S10. The optimized geometries and the molecular orbital surfaces of the HOMOs and LUMOs for three monomers.
